# Supplementary material
Source: PubMed Central journal article supplement (PMC4213092)
Supplement: supp_pp.114.240929_240929suppfig1.pdf [file supp_pp.114.240929_240929suppfig1.pdf]

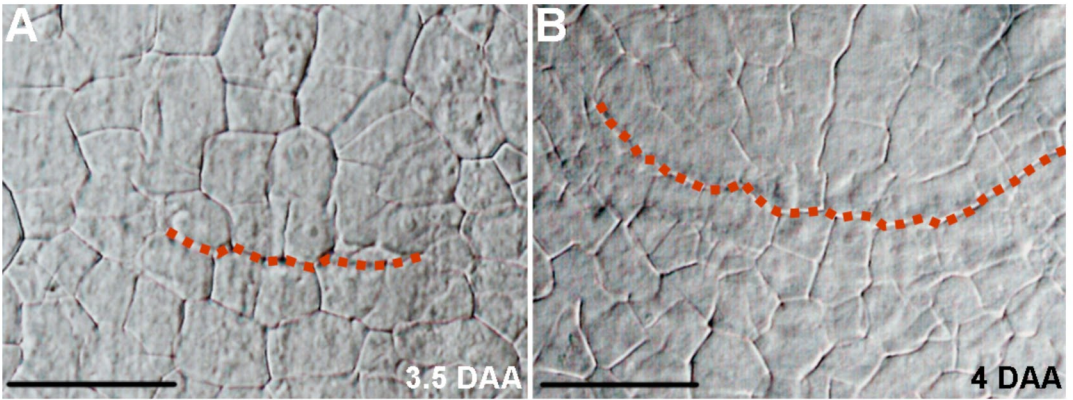

**Supplemental Figure S1.** Formation of the cap junction during rice embryogenesis. A, Figure 1E marked with a red dash line that indicates the emerging cap junction at 3.5 DAA. B, Figure 1F marked with a red dash line that indicates the laterally expanding cap junction at 4 DAA. Scale bars = 25  $\mu\text{m}$ .
