# Supplementary material
Source: PubMed Central journal article supplement (PMC4213092)
Supplement: supp_pp.114.240929_240929SupplementaL_Figures-2.pdf [file supp_pp.114.240929_240929SupplementaL_Figures-2.pdf]

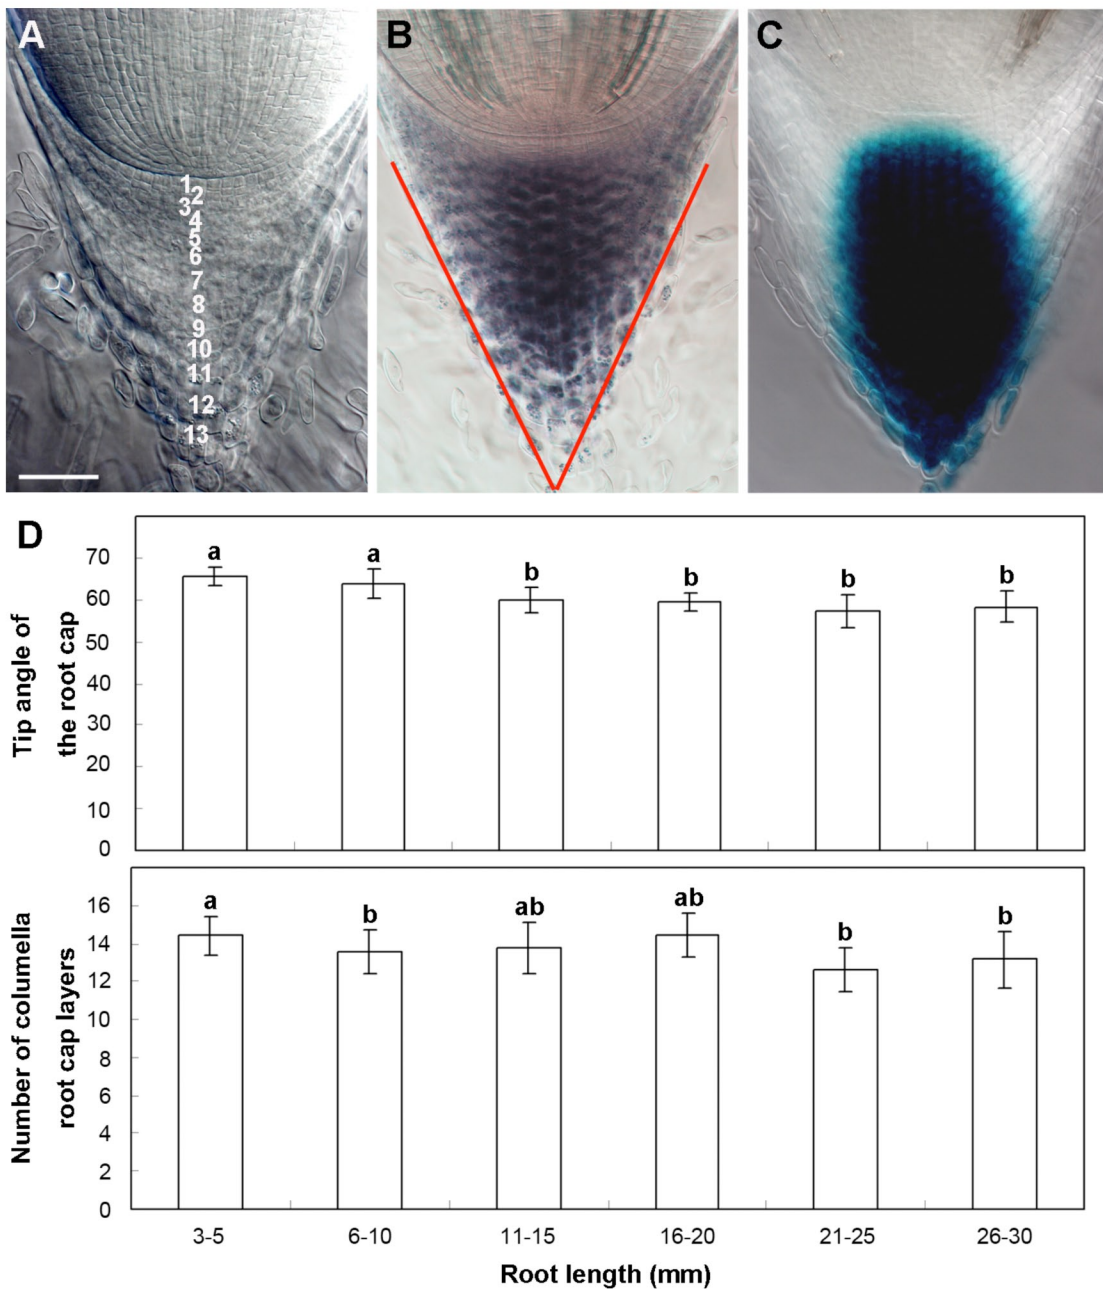

**Supplemental Figure S2.** Tip angle of the radicle root cap and number of columella root cap layers in the radicle. A, Nomarski-optics image of the radicle root tip. Numbers indicate layers of the columella root cap. B, Lugol's staining of starch granules in the radicle root cap. The red lines show how the tip angle of the radicle root cap was measured. C, GUS staining of the radicle root tip of the columella root cap specific GAL4 line A788. D, Time course analysis of the tip angle of the radicle root cap and number of columella root cap layers in the radicle. Note that the tip angle of the radicle root cap became stabilized once the length of the radicle was longer than 10 mm. Error bars represent the standard deviation (s.d.). Bars with different letters are significantly different at  $p < 0.01$ . All images were taken at the same magnification and the scale bar in (A) represents 50  $\mu\text{m}$ .
