# Supplementary material
Source: PubMed Central journal article supplement (PMC4213092)
Supplement: supp_pp.114.240929_240929SupplementaL_Figures-3.pdf [file supp_pp.114.240929_240929SupplementaL_Figures-3.pdf]

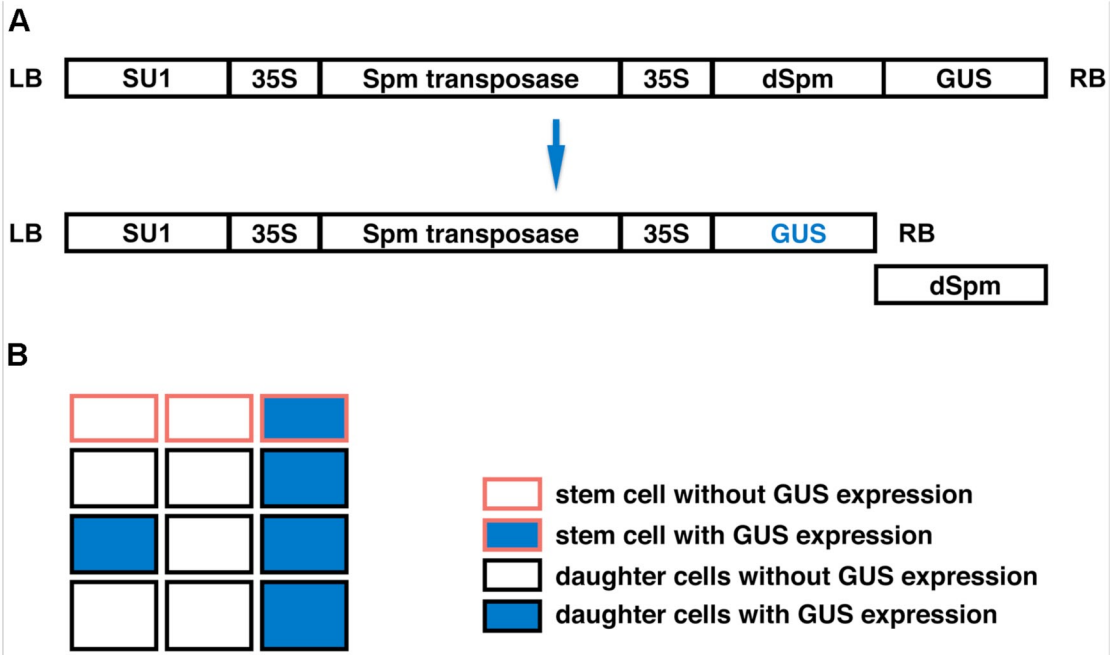

**Supplemental Figure S3.** Schematic diagram of the cell lineage tracing system. A, The 35S::Spm-GUS (SLJ8313) (Tissier et al., 1999) construct used in this study. Only the region flanked by the left border (LB) and right border (RB) is shown. The GUS gene is expressed upon excision of the dSpm, allowing the analysis of cell lineage in the radicle root cap. SU1, counter-selectable marker. B, A schematic view of transposition events occurred in the root cap. Transposition of the dSpm element in the root cap stem cells, but not in the non-dividing daughter cells, results in a GUS-positive clonal sector.
