# Supplementary material
Source: PubMed Central journal article supplement (PMC4213092)
Supplement: supp_pp.114.240929_240929SupplementaL_Figures-4.pdf [file supp_pp.114.240929_240929SupplementaL_Figures-4.pdf]

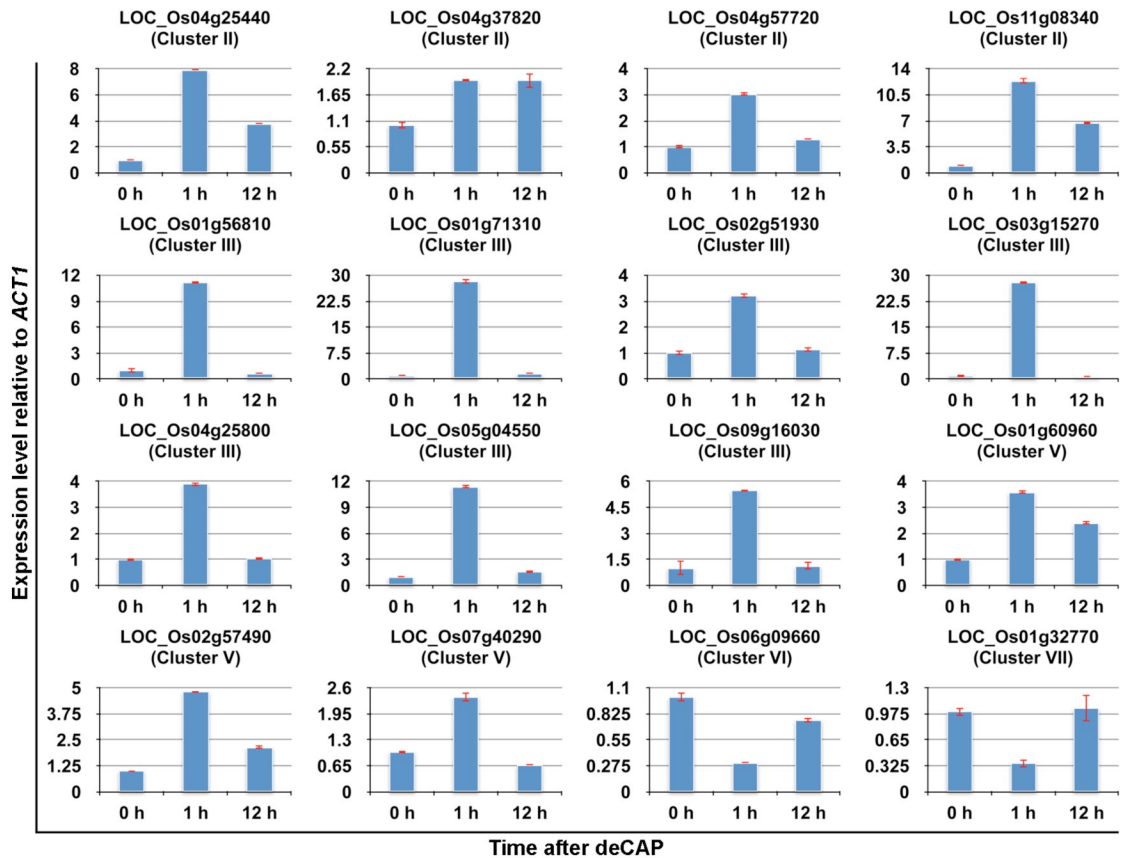

**Supplemental Figure S4.** Validation of 16 differentially expressed transcripts by qRT-PCR. 16 transcripts detected by RNAseq as differentially expressed for either or both of 1 h/0 h and 12 h/1 h were selected and validated by qRT-PCR. Each qRT-PCR assay was repeated three times. Error bars represent the standard deviation (s.d.).
