# Supplementary material
Source: PubMed Central journal article supplement (PMC4213092)
Supplement: supp_pp.114.240929_240929SupplementaL_Figures-5.pdf [file supp_pp.114.240929_240929SupplementaL_Figures-5.pdf]

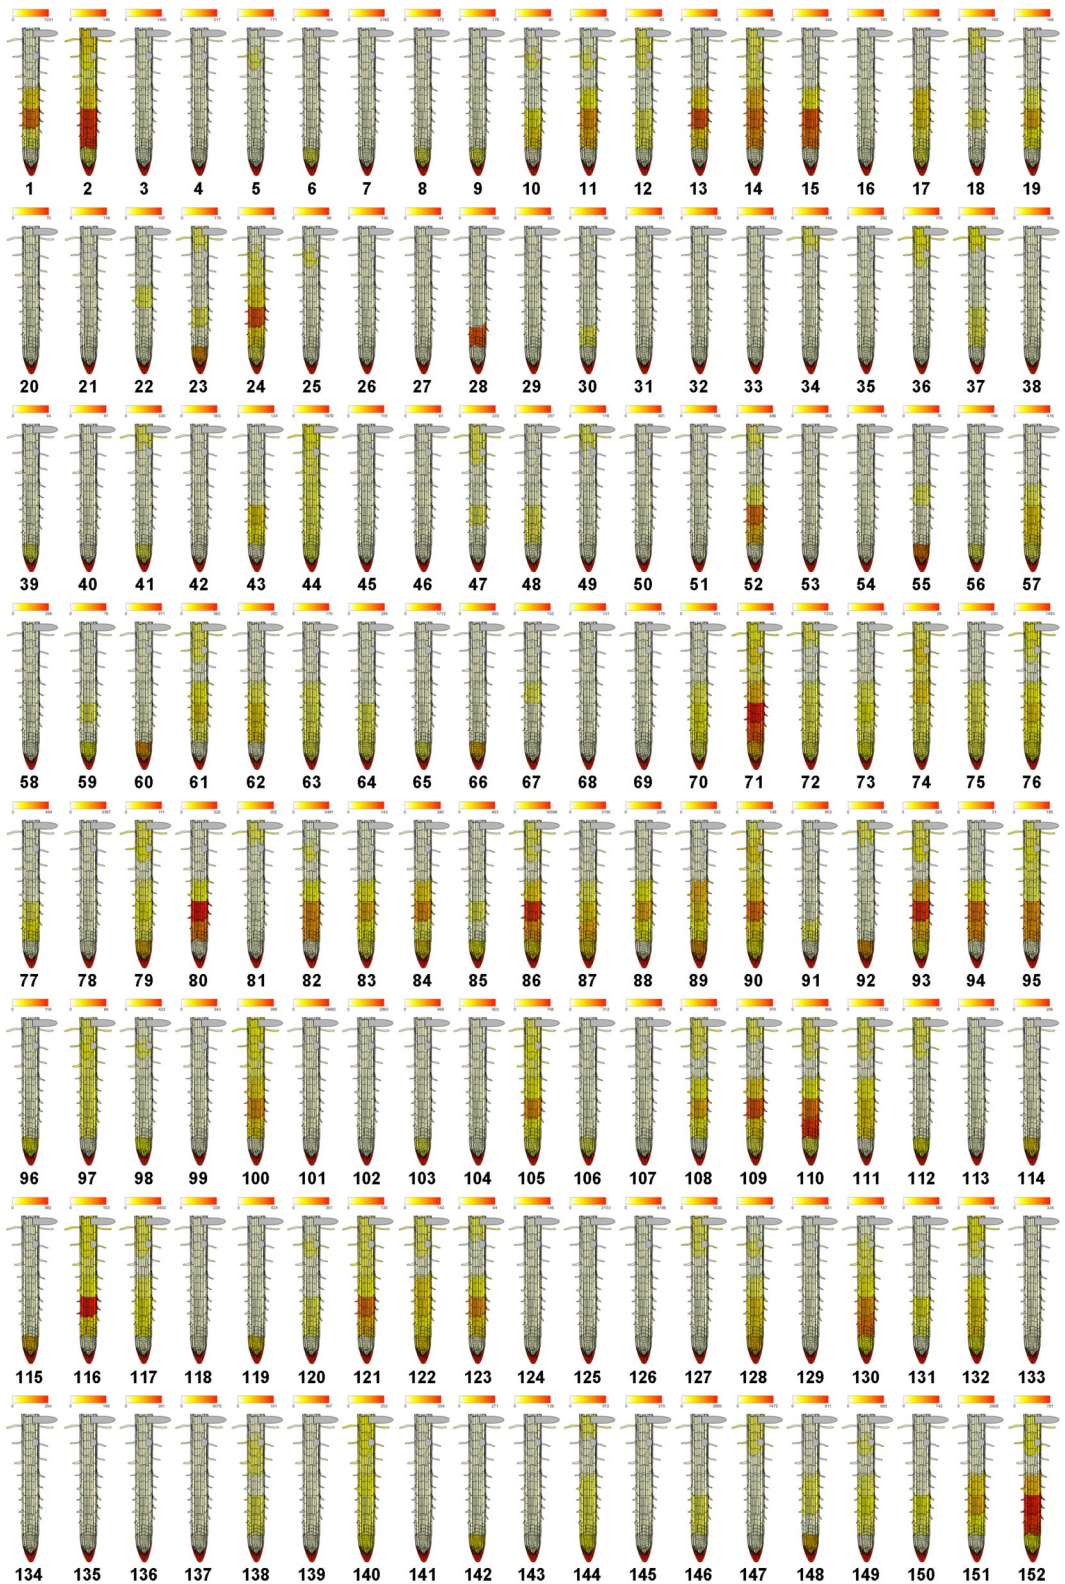

**Supplemental Figure S5.** Expression patterns of 152 root cap genes in the rice root. All data were compiled from the RiceXPro database (Sato et al., 2013) ([http://ricexpro.dna.affrc.go.jp/RXP\\_4001/index.php](http://ricexpro.dna.affrc.go.jp/RXP_4001/index.php)). See Table S3 for the gene list.
